# Supplementary material for: A self-powered WO 3 -based photoelectrochemical synapse for object distance judgment
Source: Royal Society of Chemistry journal article supplement (doi:10.1039/d5tc03463a), 2025-12-05
Supplement: d5tc03463a1.pdf [file d5tc03463a1.pdf]

**Supporting Information**  
**for**  
**Self-Powered WO<sub>3</sub>-Based Photoelectrochemical Synapse**  
**for Object Distance Judgment**

Jinhai Yang, Xueqi Chen, Shengqi Huang, Xiaotian Han, Zongyu Huang,  
Yang Chen\*, Xiang Qi\*

Hunan Key Laboratory of Micro-Nano Energy Materials and Devices, School of  
Physics and Optoelectronics, Xiangtan University, Xiangtan, Hunan 411105, P. R. China  
E-mail address: cy@xtu.edu.cn; xqi@xtu.edu.cn

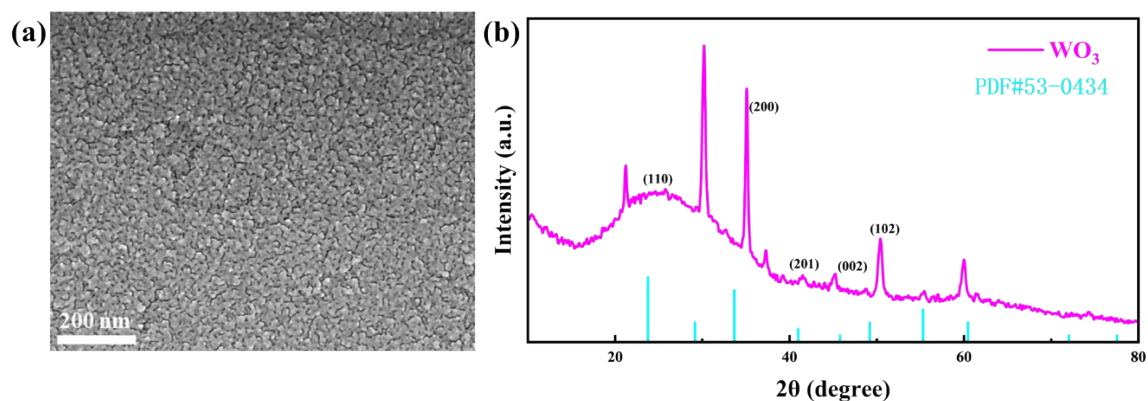

**Figure S1.** (a) High-magnification scanning electron microscopy (SEM) image showing detailed particle boundaries, inter-grain connections, and nanoscale surface morphologies of the  $\text{WO}_3$  film; (b) X-ray diffraction (XRD) pattern of the prepared  $\text{WO}_3$  film (light red curve) and standard XRD card (PDF#53-0434, cyan curve) for monoclinic  $\text{WO}_3$ , with characteristic diffraction peaks labeled as (110), (102), (200), (201), and (002). The scale bar in (a) is 200 nm; XRD test range: 20–80° ( $2\theta$ ).

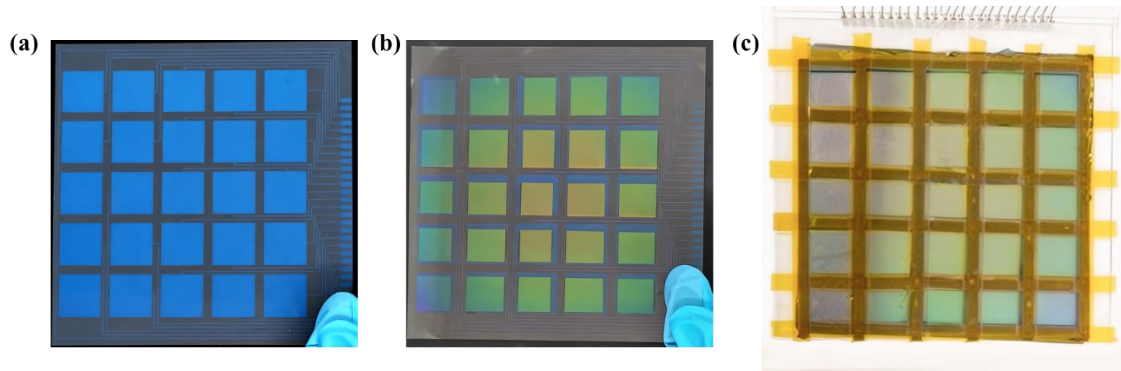

**Figure S2.** (a) Bare  $5 \times 5$  array substrate (ITO glass); (b) Substrate after radio frequency (RF) sputtering of  $\text{WO}_3$  film; (c) Schematic diagram of the  $\text{WO}_3$ -based PEC synapse device.

Key parameters: Each photoelectrode pixel has an effective area of  $1.5 \times 1.5 \text{ cm}^2$ ; each pixel is connected to an independent ITO wire as the photoanode; a quasi-solid electrolyte (polyvinyl alcohol- $\text{Na}_2\text{SO}_4$  composite) is used as the ion transport medium; conductive graphite sheets serve as the common cathode. Sputtering conditions:  $\text{WO}_3$  target power 50 W, sputtering pressure 3 Pa, substrate temperature  $0^\circ\text{C}$ , sputtering time 30 min.

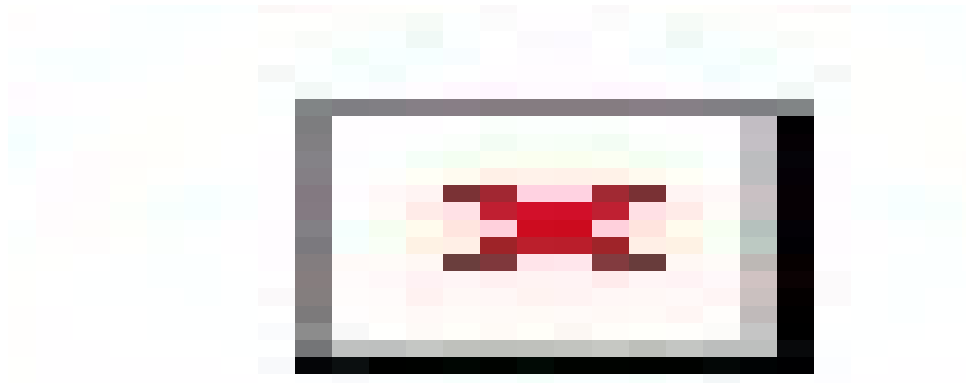

**Figure S3.**  $\Delta$ PSV response curves of six randomly selected pixels (distributed at the center, edge, and corner of the array) to the same light pulse stimulus (light power density  $120 \text{ mW/cm}^2$ , pulse duration 10 s). The consistent response amplitude and waveform of the six pixels demonstrate good uniformity and reproducibility of the synaptic array.

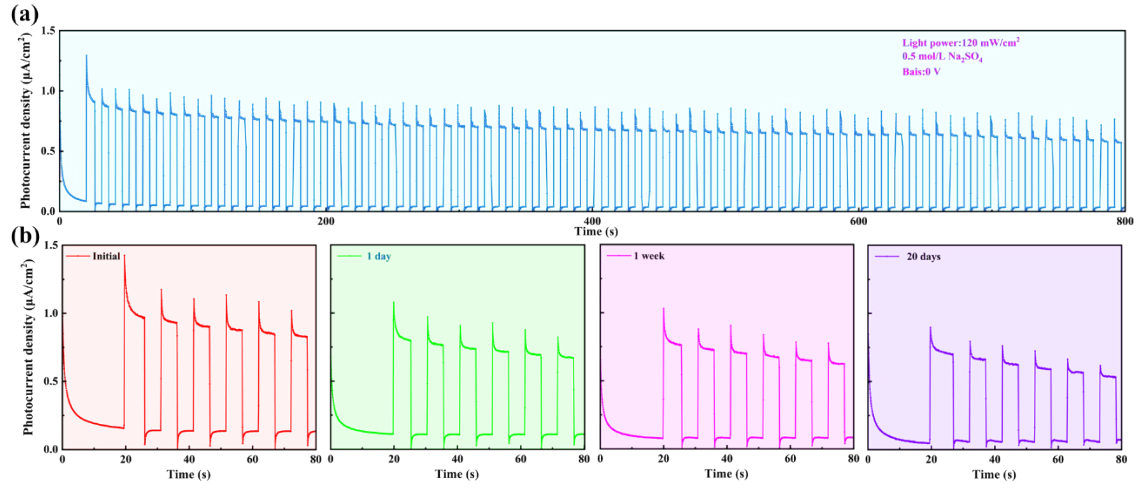

**Figure S4.** (a) Cycle stability: I-T response curves of the synapse device under 78 consecutive light pulse cycles (test conditions: light power  $120 \text{ mW}/\text{cm}^2$ , electrolyte  $0.5 \text{ mol/L Na}_2\text{SO}_4$ , bias  $0 \text{ V}$ ); (b) Time stability: I-T response curves tested immediately after device fabrication (initial), 1 day, 1 week, and 20 days of storage (ambient temperature, dry environment, same test conditions as (a)). The stable response amplitude confirms the long-term reliability of the device.

**Table S1.** Raw data of distance (D), inverse square of distance ( $1/D^2$ ), and average

| Actual Distance D(dm) | $1/D^2(\text{dm}^{-2})$ | Average Synaptic Voltage $V_{\text{avg}}(\text{mV})$ |
|-----------------------|-------------------------|------------------------------------------------------|
| 1                     | 1.000                   | $8.0 \pm 0.3$                                        |
| 2                     | 0.250                   | $3.4 \pm 0.2$                                        |
| 4                     | 0.0625                  | $3.0 \pm 0.2$                                        |
| 6                     | 0.0278                  | $2.5 \pm 0.2$                                        |
| 8                     | 0.015625                | $1.8 \pm 0.1$                                        |
| 10                    | 0.0100                  | $1.0 \pm 0.1$                                        |

synaptic photovoltage ( $V_{\text{avg}}$ ).

Note:  $V_{\text{avg}}$  is the average value of  $\Delta\text{PSV}$  responses from 25 pixels in the  $5 \times 5$  array, with  $\pm$  values representing the standard deviation of three parallel tests; test conditions: light power  $120 \text{ mW/cm}^2$  (fixed at each distance).

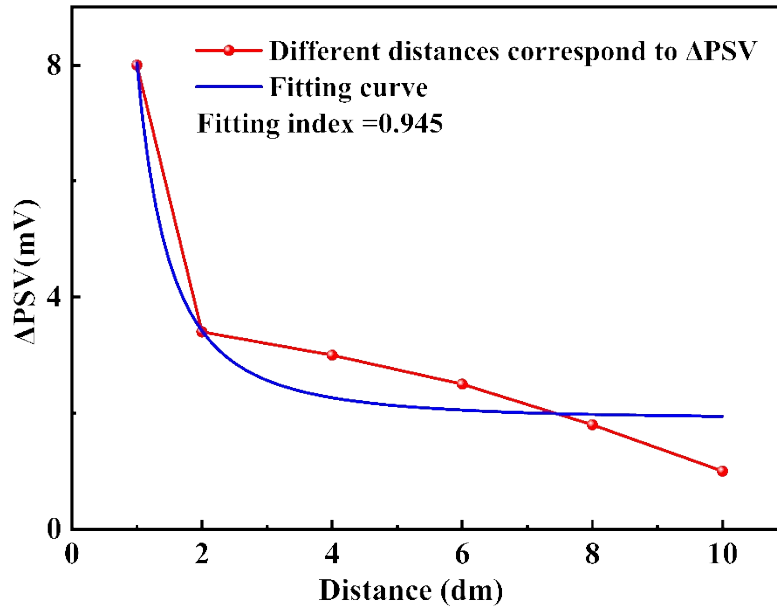

**Figure S5.** Scatter plot of  $\Delta\text{PSV}$  (mV) versus object distance D (dm) (red dots), and the fitting curve (blue line) based on the inverse square law. Fitting equation:  $\Delta\text{PSV} = 6.15 \times (1/D^2) + 1.88$  ( $R^2 = 0.945$ ). The high fitting coefficient confirms that the  $\Delta\text{PSV}$  response of the synapse device follows the inverse square law of light intensity, supporting the feasibility of object distance judgment.
